1 **Genomic Insights for Personalized Care: Motivating At-Risk Individuals Toward**  
2 **Evidence-Based Health Practices**

3  
4 Tony Chen<sup>1,\*</sup>, Giang Pham<sup>2</sup>, Louis Fox<sup>2</sup>, Nina Adler<sup>3,4</sup>, Xiaoyu Wang<sup>5,6</sup>, Jingning Zhang<sup>7</sup>,  
5 Jinyoung Byun<sup>8</sup>, Younghun Han<sup>8</sup>, Gretchen R.B. Saunders<sup>9</sup>, Dajiang Liu<sup>10</sup>, Michael J.  
6 Bray<sup>11,12</sup>, Alex T. Ramsey<sup>2</sup>, James McKay<sup>13</sup>, Laura Bierut<sup>2</sup>, Christopher I. Amos<sup>8,14</sup>,  
7 Rayjean J. Hung<sup>4</sup>, Xihong Lin<sup>1,15</sup>, Haoyu Zhang<sup>5,†,\*</sup>, Li-Shiun Chen<sup>2,†,\*</sup>

8  
9 <sup>1</sup> Department of Biostatistics, Harvard T.H. Chan School of Public Health, Boston, USA

10 <sup>2</sup> Department of Psychiatry, Washington University School of Medicine, St. Louis, USA

11 <sup>3</sup> Department of Anthropology, University of Toronto, Mississauga, ON, Canada

12 <sup>4</sup> Prosserman Centre for Population Health Research, Lunenfeld-Tanenbaum Research  
13 Institute, Sinai Health, and University of Toronto, Toronto, Canada

14 <sup>5</sup> Division of Cancer Epidemiology and Genetics, National Cancer Institute, Bethesda,  
15 MD, USA

16 <sup>6</sup> Cancer Genomics Research Laboratory, Frederick National Laboratory for Cancer  
17 Research, Leidos Biomedical Research Inc, Rockville, MD, USA

18 <sup>7</sup> Department of Biostatistics, Johns Hopkins Bloomberg School of Public Health,  
19 Baltimore, USA.

20 <sup>8</sup> Department of Medicine, Section of Epidemiology and Population Science, Institute for  
21 Clinical and Translational Research, Houston, TX, USA

22 <sup>9</sup> Department of Psychology, University of Minnesota, Minneapolis, MN, USA

23 <sup>10</sup> Department of Public Health Sciences, Penn State College of Medicine, Hershey, PA,  
24 USA

25 <sup>11</sup> Department of Genetic Counseling, Bay Path University, Longmeadow, MA, USA

26 <sup>12</sup> ThinkGenetics, Inc, USA

27 <sup>13</sup> International Agency for Research on Cancer, World Health Organization, Lyon,  
28 France

29 <sup>14</sup> Dan L Duncan Comprehensive Cancer Center, Baylor College of Medicine, Houston,  
30 TX, USA

31 <sup>15</sup> Department of Statistics, Harvard University, Cambridge, USA

32  
33 \*Correspondence to: Tony Chen ([tonychen@g.harvard.edu](mailto:tonychen@g.harvard.edu)), Haoyu Zhang  
34 ([haoyu.zhang2@nih.gov](mailto:haoyu.zhang2@nih.gov)) and Li-Shiun Chen ([li-shiun@wustl.edu](mailto:li-shiun@wustl.edu)).

35 †These authors jointly supervised this work: Haoyu Zhang and Li-Shiun Chen.

36 **Abstract**

37 **Background:** Lung cancer and tobacco use pose significant global health challenges,  
38 necessitating a comprehensive translational roadmap for improved prevention  
39 strategies. Polygenic risk scores (PRSs) are powerful tools for patient risk stratification  
40 but have not yet been widely used in primary care for lung cancer, particularly in diverse  
41 patient populations.

42  
43 **Methods:** We propose the GREAT care paradigm, which employs PRSs to stratify  
44 disease risk and personalize interventions. We developed PRSs using large-scale multi-  
45 ancestry genome-wide association studies and standardized PRS distributions across  
46 all ancestries. We applied our PRSs to 796 individuals from the GISC Trial, 350,154  
47 from UK Biobank (UKBB), and 210,826 from All of Us Research Program (AoU), totaling  
48 561,776 individuals of diverse ancestry.

49  
50 **Results:** Significant odds ratios (ORs) for lung cancer and difficulty quitting smoking  
51 were observed in both UKBB and AoU. For lung cancer, the ORs for individuals in the  
52 highest risk group (top 20% versus bottom 20%) were 1.85 (95% CI: 1.58 – 2.18) in  
53 UKBB and 2.39 (95% CI: 1.93 – 2.97) in AoU. For difficulty quitting smoking, the ORs  
54 (top 33% versus bottom 33%) were 1.36 (95% CI: 1.32 – 1.41) in UKBB and 1.32 (95%  
55 CI: 1.28 – 1.36) in AoU.

56  
57 **Conclusion:** Our PRS-based intervention model leverages large-scale genetic data for  
58 robust risk assessment across populations. This model will be evaluated in two cluster-  
59 randomized clinical trials aimed at motivating health behavior changes in high-risk  
60 patients of diverse ancestry. This pioneering approach integrates genomic insights into  
61 primary care, promising improved outcomes in cancer prevention and tobacco treatment.

62  
63 **Keywords:** Lung Cancer, Polygenic risk scores, Cancer prevention, Personalized  
64 interventions, Translational roadmap, Health behavior change

## 65 Introduction

66 The worldwide burden of lung cancer and tobacco smoking presents major challenges  
67 to global health<sup>1</sup>. Evidence-based practices to reduce their risk such as cancer  
68 screening and tobacco treatment (e.g. smoking cessation medication) have long existed  
69 but are infrequently used in most primary care practices. Communication of the  
70 precision risk of lung cancer and precision benefit of smoking cessation is a promising  
71 but untested strategy to promote health behavior changes to reduce cancer risk. To  
72 address this gap, polygenic risk scores (PRSs) emerge as a valuable approach to  
73 assess disease susceptibility among populations and pinpoint individuals at higher risk<sup>2-</sup>  
74 <sup>4</sup>. PRSs can be derived from large-scale genome-wide association studies (GWAS) to  
75 estimate individual disease risk and have shown promise in predicting health outcomes  
76 and promoting preventive healthcare<sup>5-9</sup>. Despite their potential, PRSs' implementation in  
77 primary care is limited, especially in diverse populations. Implementing a PRS-based  
78 precision intervention is crucial in order to address the multifaceted needs of different  
79 communities and individuals<sup>10</sup>. Harnessing PRSs effectively can make significant  
80 progress in mitigating lung cancer's public health impact.

81  
82 Ongoing studies like eMERGE<sup>11</sup>, GenoVA<sup>12</sup>, and WISDOM<sup>13</sup> are leading the  
83 implementation of PRS into genetic risk reports (**Table 1**). They aim to personalize  
84 medical reports and understand the impact of PRS on screening, diagnostic procedures,  
85 and patient behavior. Notably, a gap persists as these initiatives have not yet formulated  
86 a PRS specifically for lung cancer. A likely reason is that the global burden of lung  
87 cancer is primarily driven by tobacco smoking rather than genetics<sup>14,15</sup>. However,  
88 accounting for the genetic basis of lung cancer may provide patients and clinicians with  
89 additional actionable information. The unique value proposition of a lung cancer-specific  
90 PRS lies in leveraging established and clear guideline-based prevention strategies,  
91 including smoking cessation treatment and lung cancer screening<sup>16</sup>. By incorporating  
92 PRSs for lung cancer and difficulty quitting smoking without treatment, there is an  
93 opportunity to revitalize and enhance these often-under-utilized prevention practices.

94

95 We introduce the Genomic Informed Care for Motivating High Risk Individuals Eligible  
96 for Evidence-based Prevention (GREAT) framework as a novel approach to incorporate  
97 PRS-enabled interventions in clinical settings (**Figure 1**). The core of GREAT is the use  
98 of PRSs that offer precise risk estimates for lung cancer and difficulty quitting smoking.  
99 By providing patients with personalized risk information, we aim to activate behavior  
100 change mechanisms that promote preventive actions. The primary targets of this  
101 intervention are high-risk individuals eligible for evidence-based prevention practices,  
102 such as lung cancer screening and smoking cessation. By integrating precision risk  
103 information with the benefits of timely interventions, GREAT empowers patients to make  
104 informed decisions about their health and motivates them to take proactive steps  
105 towards prevention. The personalized information may increase the patient uptake of  
106 evidence-based treatment by activating potential mechanisms such as treatment.  
107 Guided by enhanced outcome expectancy and self-efficacy based on the Capability-  
108 Opportunity-Motivation-Behavior (COM-B) model and Theoretical Domains Framework  
109 (TDF)<sup>17-19</sup>. Ultimately, our objective is not only to motivate, but to significantly reduce  
110 lung cancer morbidity and mortality through this innovative care paradigm.

111  
112 Effectively translating PRSs into clinical practice requires a comprehensive and  
113 pragmatic translational roadmap for equitable and effective implementation (**Figure 1**).  
114 First, to address ancestry diversity, we take a two-step approach of (1) constructing  
115 PRS based on large-scale multi-ancestry GWAS, and (2) standardizing PRS  
116 distributions across the continuum of genetic ancestry to ensure accurate risk  
117 stratification based on PRS distributions for all patients<sup>20</sup>. Second, to document  
118 accuracy and transportability of the PRSs to diverse populations, we perform large-  
119 scale validation using diverse data from the Genetic Informed Smoking Cessation  
120 (GISC) trial<sup>21</sup>, UK Biobank (UKBB)<sup>22</sup>, and All of Us Research program (AoU)<sup>23</sup>. Third,  
121 we translate risk into actionable categories by setting appropriate thresholds for the  
122 PRS. The alignment of these thresholds with clinical significance involves many  
123 considerations for meaningful risk stratification. Fourth, we propose clear and patient-  
124 friendly communication strategies, including visual aids and educational materials, to  
125 facilitate understanding and meaningful interactions between patients and healthcare

126 providers. Effectively communicating both the risk and precision of the PRS results is  
127 challenging but essential to empower patients to make informed decisions about their  
128 health. Moreover, it is crucial to consider patient perceived risk, perceived benefit, and  
129 personal relevance when discussing PRS results with patients. Patients' understanding  
130 and interpretation of PRS may vary, leading to differing levels of engagement in  
131 preventive actions. Hence, comprehensive patient education programs can enhance  
132 awareness and knowledge about PRS, its implications, and available preventive  
133 measures.

134  
135 In this paper, we introduce the design for two cluster randomized clinical trials (RCT): (1)  
136 PRECISE, which evaluates the effectiveness of a multilevel intervention, *RiskProfile*, on  
137 increasing lung cancer screening and tobacco treatment utilization in primary care  
138 (NIDA Grant 5R01CA268030-02); and (2) MOTIVATE, which evaluates the effect of  
139 PrecisionTx, a multilevel intervention to promote precision tobacco treatment in primary  
140 care (NIDA Grant 5R01DA056050-02). Through the innovative use of PRS, our aim is to  
141 motivate lung cancer screening and tobacco treatment among high-risk patients. We  
142 present a new care paradigm (**Figure 1**) and outline a translational roadmap (**Figure 2**)  
143 that discusses potential barriers and solutions for implementation. By incorporating  
144 personalized risk assessments, such PRS-enabled interventions have the potential to  
145 significantly improve lung cancer prevention strategies and patient outcomes.

146

## 147 **Materials and Methods**

### 148 1000 Genomes Project Phase 3 reference data and principal components analysis

149 We use the 1000 Genomes Project Phase 3 (1000G)<sup>24,25</sup> as a reference for genetic  
150 ancestry inference, as it is publicly accessible and includes genotype data from diverse  
151 populations. The 1000G dataset includes 3,202 individuals, with 633 Europeans (EUR),  
152 893 Africans (AFR), 585 East Asians (EAS), 601 South Asians (SAS), and 490 Admixed  
153 Americans (AMR). We conducted principal components analysis (PCA) plink 2.0<sup>26</sup> on all  
154 3,202 samples, using 55,248 SNPs that are shared among the recommended SNPs set  
155 by gnomAD<sup>27</sup>, 1000G reference data, UKBB and GISC validation data, and the

156 23andMe genotyping array used for the trial (**Figure 3, Supplementary Figure 1,**  
157 **Supplementary Table 4**).

158  
159 We ran a random forest classifier to map each individual in 1000G to their respective  
160 populations using the first 5 PC scores. We then projected our validation data to this PC  
161 space and applied the same random forest classifier to produce “genetically-inferred”  
162 ancestry labels. Individuals with a predicted probability less than 90% for any of the five  
163 ancestries were labeled as “Other.” While our proposed framework removes the need  
164 for labels in the clinic, we use them here for illustrative purposes in validation.

165  
166 Validation in GISC, UK Biobank, and All of Us

167 We validated our PRS approaches in three datasets: Genetically Informed Smoking  
168 Cessation Trial (GISC)<sup>21</sup>, UK Biobank (UKBB)<sup>22</sup>, and All of Us Research Program  
169 (AoU)<sup>23</sup> Here we present are brief background of the three studies. More details of the  
170 study background are provided in the **Supplementary Note**, and sample characteristics  
171 regarding sex, age, and outcomes information in UKBB and AoU are provided in  
172 **Supplementary Table 1**.

173  
174 GISC Trial: The GISC trial, conducted at Washington University in St  
175 Louis<sup>21</sup>, included 822 current or previous smokers. Genetic data were available for 796  
176 individuals (503 European, 257 African, 36 Other self-reported ethnicities), This dataset  
177 was primarily used for ancestry inference validation due to its relevance to our  
178 PRECISE and MOTIVATE trials.

179  
180 UKBB: The UKBB dataset included 340,154 unrelated individuals with rich genetic and  
181 clinical data. This cohort consisted of 6,844 African, 730 Admixed American, 770 East  
182 Asian, 313,279 European, 7,197 South Asian, and 11,334 Other individuals by  
183 genetically-inference ancestry. The lung cancer analysis included 1,830 cases (ICD10  
184 codes C34.0-C34.9) and 338,334 controls. The smoking cessation analysis involved  
185 152,406 ever-smokers (117,483 former and 34,923 current), excluding 186,040 never  
186 smokers and 1,312 prefer-not-to-answer responses.

187

188 AoU: The AoU dataset included 210,826 unrelated individuals with whole-genome  
189 sequencing data. This cohort comprised 45,108 African, 32,563 Admixed American,  
190 3,873 East Asian, 110,712 European, 1,689 South Asian, and 16,881 Other individuals  
191 by genetically-inference ancestry. We focused on 152,916 current or previous smokers  
192 for our smoking analysis.

193

#### 194 Construction of polygenic risk scores

195 Our trial incorporates the latest findings by utilizing recently genome-wide association  
196 study (GWAS) summary statistics for lung cancer<sup>28</sup> and difficulty quitting smoking<sup>29</sup>,  
197 excluding UK Biobank samples to avoid overlapping with our validation data. While  
198 these meta-analyses predominantly consist of individuals of European ancestry, they  
199 also include a substantial proportion of non-European ancestry — about 26% for lung  
200 cancer and 21% for difficulty quitting smoking — which enhances the generalizability of  
201 the findings<sup>30,31</sup>.

202

203 For lung cancer risk, we started with 128 published SNPs found to be predictive of 5-  
204 year and lifetime cumulative risk for lung cancer<sup>16</sup>. Out of these, 101 SNPs overlapped  
205 with the published summary statistics, reference, and validation data (1000G, UKBB,  
206 GISC and AoU), and the 23andMe genotyping array used for the trial (**Supplementary**  
207 **Figure 1**). These SNPs were assigned effect sizes from the fixed-effect meta-analyses  
208 estimates in the latest lung cancer GWAS that includes EUR, AFR, and EAS ancestry<sup>28</sup>.  
209 For difficulty quitting smoking, we identified 175 SNPs predictive for smoking cessation  
210 following the same filtering procedure for lung cancer<sup>29</sup>.

211

212 The PRS construction began with the alignment of genotype data to the summary  
213 statistics, ensuring consistent PRS regardless of allele coding. Specifically, for any SNP  
214  $G$  with reversed alleles, we recoded it as  $2 - G$  to avoid discrepancies. The raw PRS for  
215 an individual  $i$  with  $M$  SNPs was computed as

$$PRS_i = \beta_1 G_{i1} + \beta_2 G_{i2} + \dots + \beta_M G_{iM}.$$

216 PRS calculations were performed using R, with genotype data input via the genio  
217 package<sup>32</sup>. PRS SNPs and weights for lung cancer and difficulty quitting smoking are  
218 provided in **Supplementary Tables 2-3**, respectively.

219

### 220 Standardizing PRS distributions across the continuum of genetic ancestry

221 We standardized the PRS distributions for lung cancer and difficulty quitting smoking  
222 using the 1000G dataset, employing a regression-based method to adjust for  
223 distributional differences across ancestries (**Supplementary Tables 4-5**)<sup>20</sup>. This  
224 adjustment process involves two key steps:

225 1. Mean adjustment: we conducted a linear regression of the raw PRS against the top  
226 five PCs derived from the PCA:

$$227 PRS_i = \alpha_0 + \alpha_1 PC_{i1} + \alpha_2 PC_{i2} + \dots + \alpha_5 PC_{i5} + \epsilon_i^{mean}.$$

228 We then computed residuals  $r_i$  of the raw PRS that account for mean differences in  
229 PRS distributions across ancestry:

$$r_i = PRS_i - \widehat{\alpha}_0 - \widehat{\alpha}_1 PC_{i1} - \dots - \widehat{\alpha}_5 PC_{i5}.$$

230 2. Variance adjustment: using the square residuals  $r_i^2$  as a proxy for PRS variance, we  
231 ran a secondary linear regression:

$$232 r_i^2 = \gamma_0 + \gamma_1 PC_{i1} + \gamma_2 PC_{i2} + \dots + \gamma_5 PC_{i5} + \epsilon_i^{var}.$$

233

234 The final ancestry-adjusted PRS for each individual  $i$  was then computed as:

$$PRS_i^{adj} = \frac{PRS_i - \widehat{\alpha}_0 - \widehat{\alpha}_1 PC_{i1} - \dots - \widehat{\alpha}_5 PC_{i5}}{\sqrt{\widehat{\gamma}_0 + \widehat{\gamma}_1 PC_{i1} + \widehat{\gamma}_2 PC_{i2} + \dots + \widehat{\gamma}_5 PC_{i5}}}$$

235 This standardization resulted in a PRS distribution with mean 0 and variance 1 across  
236 ancestries, ensuring that genetic risk is accurately reflected independent of ancestry.  
237 This method is crucial for individuals with admixed or unknown ancestry, where discrete  
238 ancestry-specific models are inappropriate<sup>33,34</sup>.

239

### 240 Definition of patient risk categories

241 We stratified patients by genetic risk for lung cancer and difficulty quitting smoking by  
242 calculating odds ratios (ORs). ORs compare the probability of an outcome occurring in



243 individuals within a percentile range  $p$  (i.e. 80-100%) of the ancestry-adjusted PRS  
244 distribution to those within a lower percentile range  $q$  (i.e. 0-20%).

$$OR_{pq} = \frac{P(Y = 1|PRS \in p)/P(Y = 0|PRS \in p)}{P(Y = 1|PRS \in q)/P(Y = 0|PRS \in q)}$$

245 We established cut points in the PRS distribution to categorize individuals into three risk  
246 groups: “at risk”, “high risk”, and “very high risk”. For lung cancer, we defined these  
247 categories as the bottom 20%, middle 60%, and top 20% of the PRS distribution. For  
248 difficulty quitting smoking, categories were the bottom, middle, and top 33%. These  
249 thresholds were chosen to communicate personalized risks and benefits to high-risk  
250 patients in our trials, all of whom are eligible for lung cancer screening due to heavy  
251 smoking. Since difficulty quitting smoking lacks established absolute risk rates, we used  
252 these percentiles to provide a more agnostic risk assessment.

253

254 We use the distribution of our ancestry-adjusted PRSs among all 1000G samples to set  
255 percentile ranges and evaluate corresponding odds ratios among UKBB and AoU  
256 participants. For comparison, we also evaluate odds ratios using ancestry-matched raw  
257 PRS distributions, i.e. European-only 1000G PRS distribution for UKBB and AoU  
258 participants with genetically predicted European ancestry. For individual with “Other”  
259 predicted ancestry, we use the overall raw PRS distribution among all 1000G samples.

260

## 261 **Results**

### 262 Harmonization PRS distributions across ancestry

263 We found notable variation in raw PRS distributions across ancestries, highlighting that  
264 applying a universal cutoff for raw PRS without accounting for ancestry can lead to  
265 biased risk profiling and inaccurate clinical recommendations (**Figure 4**). However, our  
266 regression-based ancestry adjustment across all three datasets yields much more  
267 standardized distributions across ancestries. Specifically, the adjusted proportions of  
268 individuals within each risk category closely align with 20%-60%-20% for lung cancer,  
269 and 33.3%-33.3%-33.3% for difficulty quitting smoking. This adjustment ensures that  
270 patients of any background can be compared against a unified reference distribution for  
271 each outcome (**Supplementary Tables 6a-f**). This standardization places individuals

272 across all ancestries on the same scale, allowing for a single risk stratification cutoff  
273 regardless of ancestral background. Such measures importantly enable fair risk  
274 assessment for individuals who may be labelled as “Other”, who may not fit well into a  
275 binned ancestry-specific risk model.

276  
277 Risk stratification for lung cancer and smoking cessation in UK Biobank and All of Us

278 After assigning UKB and AoU participants as “at risk”, “high risk”, or “very high risk” for  
279 lung cancer and difficulty quitting smoking, we identified significant odds ratios for both  
280 traits across different ancestry groups (**Figure 5, Supplementary Tables 7-10**). Our  
281 ancestry-adjusted PRS yielded similar ORs as using ancestry-matched distributions,  
282 demonstrating that a single PRS distribution can be appropriately applied to all  
283 individuals. In UKBB, the overall ORs for lung cancer 1.42 (95% CI: 1.24 – 1.65) for the  
284 “high risk” group and 1.85 (95% CI: 1.58 – 2.18) for “very high risk” group compared to  
285 the “at risk” group (**Supplementary Table 7a**). In AoU, these ORs were slightly higher –  
286 1.65 (95% CI: 1.36 – 2.02) for “high risk” group and 2.39 (95% CI: 1.93 – 2.97) for “very  
287 high risk” group. While the ORs in non-European ancestries within UKBB were not  
288 significant, they were significant and even higher than those for European ancestries in  
289 AoU (**Supplementary Table 8a**). Moreover, the ORs for “Other” ancestry group in AoU  
290 were much higher and more significant using the ancestry-adjusted PRS compared to  
291 raw PRS, where an ancestry-matched risk distribution is least suitable (**Supplementary**  
292 **Table 8b**).

293  
294 We observed similar patterns for difficulty quitting smoking, where the ancestry-adjusted  
295 PRS performed similar or better than using ancestry-matched distributions for raw PRS.  
296 In UKBB, the overall ORs for difficulty quitting smoking were 1.19 (95% CI: 1.15 – 1.22)  
297 for “high risk” group and 1.36 (95% CI: 1.32 – 1.41) for “very high risk” group  
298 (**Supplementary Table 9a**). In AoU, the ORs were 1.12 (95% CI: 1.08 – 1.15) for “high  
299 risk” group and 1.32 (95% CI: 1.28 – 1.36) for “very high risk” (**Supplementary Table**  
300 **10a**) group. Notably, we observed higher and more significant ORs in non-European  
301 AoU participants when using the ancestry-adjusted PRS compared to the raw PRS.  
302 Although the improvement within each specific ancestry group was not as substantial,

303 the aggregate ORs in all non-European groups increased from 0.89 (95% CI: 0.86 –  
304 0.93) to 1.05 (95% CI: 1.01 – 1.09) in the “high risk” group, and from 1.07 (95% CI: 1.03  
305 – 1.11) to 1.23 (95% CI: 1.18 – 1.28) in the “very high risk” group.

306  
307 Using ancestry-adjusted PRS ensures accurate risk stratification across all ethnic  
308 backgrounds, a critical consideration given the substantial variability in raw PRS  
309 distributions across diverse populations. The outcome-based validation in UKBB and  
310 AoU further verifies that the ancestry-adjusted PRS provides valid risk stratification, and  
311 often yields better risk stratification for non-European ancestries compared to ancestry-  
312 matched modeling. These findings collectively facilitate a more robust and standardized  
313 application of PRS in clinical reporting.

314  
315 Translating polygenic risk scores into clinical reports

316 We highlight two example trials: PRECISE (NIDA Grant 5R01CA268030-02) and  
317 MOTIVATE (NIDA Grant 5R01DA056050-02), designed to promote health behavior  
318 change using genetically-informed interventions, RiskProfile and PrecisionTx,  
319 respectively. These interventions incorporate PRS to communicate precision risk of lung  
320 cancer and precision benefits of smoking cessation, promoting evidence-based  
321 practices such as cancer screening and tobacco treatment in high-risk individuals who  
322 smoke and/or are eligible for lung cancer screening. PRS risk stratification from either  
323 RiskProfile or PrecisionTx, along with clinical information, is delivered within a  
324 comprehensive report that includes actionable recommendations to reduce lifetime risk  
325 (**Figure 6** and **Figure 7**). Access to 23andMe genotypes and expanded health  
326 information has been a motivating component for the research participants. Both  
327 PRECISE and MOTIVATE are currently in the preliminary phases of recruiting primary  
328 care providers and patients. The recruitment strategy aims to engage over 100  
329 physicians and 1600 patients in these trials.

330  
331 **Discussion**

332 In this study, we introduce the GREAT framework in primary care, applying PRSs in two  
333 trials to provide precise risk estimates for lung cancer and difficulty quitting smoking to

334 high-risk individuals. These estimates aim to activate behavior change mechanisms that  
335 promote health. To enable the interventions, we present a translational roadmap to  
336 implement genetic data in PRS-enabled interventions designed to promote health  
337 behaviors, evaluating their effectiveness in motivating high-risk patients to increase  
338 cancer screening and smoking cessation.

339  
340 Importantly, we have accomplished our goals of generating behavior-change  
341 interventions by a) framing our translational message specifically for high-risk patients  
342 who have not received guideline-recommended cancer screening or tobacco  
343 treatment<sup>35-38</sup>, b) translating risk categories into precision risk and benefit that are  
344 designed to motivate health behavior changes, and c) ensuring inclusion of diverse  
345 ancestry with PC-regression-based PRS adjustment.

346  
347 Our goal is to enable a robust implementation of PRS in currently funded clinical trials to  
348 evaluate the efficacy of these relatively novel interventions. The GREAT framework  
349 guides the implementation of PRS-enabled interventions in primary care. Future  
350 research need to address critical questions such as timing, methodology, and location of  
351 these interventions' delivery to patients and providers to optimize its acceptability,  
352 understanding, and impact.

353  
354 Our approach to ancestry adjustment of PRS employs widely accessible data from the  
355 1000G dataset, as an alternative to methods in the GenoVA<sup>12</sup> and eMERGE<sup>11</sup> studies  
356 that use data from the Mass-General Brigham Biobank and AoU, respectively. We  
357 validated the transferability of our 1000G-based standardization in external datasets  
358 from the UKBB, GISC and AoU, allowing future trials to adopt a similar methodology  
359 irrespective of their specific genetic data. By utilizing our provided PC loadings and PRS  
360 standardization formula for lung cancer and difficulty quitting smoking, new patients in  
361 these trials can receive accurate risk categorization reports, bypassing the inaccuracies  
362 of self-reported ethnicity and the need for re-training PCA models.

363

364 A notable gap in current practice is the absence of genetic information in electronic  
365 health records (EHRs) for decision support and the lack of PRS generation in clinical  
366 labs. Implementing precision interventions in primary care necessitates a workflow that  
367 incorporates EHRs for recruitment, biomarker testing protocols, and standardized  
368 processes to generate personalized intervention reports<sup>39</sup>. This requires collaborations  
369 with primary care stakeholders, community advisory boards, genetic counseling, and  
370 health communication to improve intervention clarity, accuracy, and impact<sup>40-44</sup>. Patients  
371 expressed a notable interest in receiving personalized interventions. In our previous  
372 study, 85% of smoking patients reported a high interest in receiving genetically tailored  
373 tobacco treatment<sup>45</sup>. Further, a substantial majority (95%) of individuals who smoke  
374 endorsed the importance of receiving genetic results to guide their treatment<sup>41</sup>.  
375 Following receipt of a personalized genetic risk profile for smoking cessation, 91% of  
376 participants who smoke found the tool highly useful for understanding their health, cope  
377 with health risks, and feeling more in control of their health<sup>42</sup>. Such pronounced interest  
378 and the perceived significance of genetic data highlight the growing demand for  
379 personalized interventions among patients who smoke. Personalized interventions may  
380 increase patient compliance. For example, study found that patients reported higher  
381 interest in taking medication (97.5% vs. 61.0%,  $p < .0001$ ) when medication was  
382 personalized based on their genetics<sup>45</sup>. However, substantial evidence suggests the  
383 complex interplay of fear, fatalism, and risk perception when patients face lung cancer  
384 screening<sup>46-49</sup>. Therefore, it is important to evaluate the translation potential of  
385 personalized genetics in motivating patients for positive behavior change.

386  
387 Unlike most current research that evaluates PRS-enabled interventions in general  
388 patient populations, our work uniquely focuses on designing and evaluating these  
389 interventions specifically among high-risk patients who will benefit tremendously from  
390 recommended health behaviors such as lung cancer screening and smoking cessation,  
391 when general medical advice is not enough to motivate such behaviors.

392  
393 Here we share three key design considerations for best practices. First, for equitable  
394 implementation of precision health interventions, tools must be designed with active

395 engagement from racial/ethnic minority communities, rather than solely examining their  
396 effectiveness for these communities post hoc. We engage in ongoing participatory  
397 sessions with racial and ethnic minority communities and advisory boards across all  
398 phases through iterative cycles of intervention development, feedback, and testing so  
399 that innovative genomics-informed tools are beneficial across diverse populations.

400  
401 Second, we have chosen clinically meaningful thresholding for PRS risk categories in  
402 communicating personalized risks and benefits to patients. These categories were  
403 selected because all participants in our ongoing trials are high-risk primary care patients  
404 eligible for lung cancer screening, who are current or former heavy smokers. We  
405 defined lung cancer risk by the bottom 20%, middle 60% and top 20%, and difficulty  
406 quitting smoking by slightly more agnostic tertiles, to motivate positive behavior change.  
407 We aim to follow best practices of communicating uncertainties and deciding between a  
408 continuous or categorical risk presentation. Transparency about the imprecision in both  
409 risk estimates and action thresholds for PRS is essential.

410  
411 Third, we plan to update our workflow to adapt to new GWAS findings and evolving  
412 methodologies. As scientific knowledge advances, outdated PRS predictions can hinder  
413 effective implementation. A dynamic PRS framework that allows for regular updates  
414 based on new discoveries is essential. This ensures that PRS-based interventions  
415 remain current and aligned with the latest advancements, reducing the implementation  
416 gap and maximizing their impact on preventive healthcare outcomes. Following current  
417 genetic counseling recommendations, we have established a process to incorporate  
418 new evidence into our intervention for smoking cessation and lung cancer risk. This  
419 process will adjudicating new population-specific evidence on genetics and biomarkers,  
420 evaluating its impact on personal and population-level risk changes, and effectively  
421 communicating the dynamic nature of genetic evidence to patients and providers.

422  
423 Our work have several limitations, but we hope contribute to the knowledge pool for the  
424 best practices in creating PRS-enabled interventions that may be disease-, population-,  
425 or context-specific. Our approach is tailored for our unique outcomes (lung cancer and

426 difficulty quitting smoking), population (patients eligible for lung cancer screening and  
427 tobacco treatment), and context (primary care) to optimize health impact. A notable  
428 limitation is the underrepresentation of non-European populations in the multi-ancestry  
429 GWAS employed to derive the PRS weights. This underrepresentation may reduce the  
430 predictive power of the PRS in non-European populations. The dominance of European  
431 populations persists in existing GWAS<sup>50-53</sup>, not limited to lung cancer and smoking  
432 cessation. However, with the burgeoning emphasis on incorporating minority  
433 populations in GWAS analyses and the development of new PRS approaches and  
434 toolkits to enhance predictive power in diverse populations<sup>7-9,34,54-56</sup>, we can iteratively  
435 refine PRS implementation in our trial to synchronize with the latest advancements.

436  
437 Many questions remain for the near future. First, how can we reduce the time lag from  
438 evidence to implementation? The constant evolution of evidence identifying new  
439 biomarkers for treatment is a challenge. For instance, our recent work highlights the  
440 potential of PRSs in guiding future treatment approaches<sup>57</sup>. Despite actionable precision  
441 treatment findings, the ever-changing evidence base and the perception of better data  
442 have hindered effective implementation<sup>43,58</sup>. To address this, we aim to use cutting-edge  
443 metabolic and genetic markers that offer robust evidence for precision treatment,  
444 reducing the time from evidence generation to practical application. This approach  
445 allows us to measure and report the time from landmark publications to the  
446 implementation of key findings<sup>59</sup>, enhancing the efficiency and effectiveness of  
447 precision treatment and ensuring patients benefit from the latest recommendations.

448  
449 Second, can we truly evaluate the effect of precision interventions? We expect that  
450 precision interventions may activate multiple mechanistic pathways to the uptake and  
451 efficacy of lung cancer screening or tobacco treatment. Understanding these  
452 mechanisms is essential to refine for intended outcomes and contexts. Third, can these  
453 precision interventions be scaled in the real-world clinics? Evidence shows that  
454 physicians are highly receptive to medication recommendations based on biomarkers<sup>60</sup>.  
455 To reduce burden, we need to leverage existing EHR tools (e.g. Best Practice  
456 Advisories) and training to efficiently facilitate physician prescribing<sup>61,62</sup>. Understanding

457 of mechanistic and implementation outcomes will guide scalable, efficient delivery  
458 components for integration into clinic workflows<sup>39</sup>, using trained embedded staff, and  
459 digital therapeutic tools to enable these PRS-informed behavioral interventions<sup>63</sup>.

460  
461 In conclusion, a well-designed roadmap that validates the PRS, incorporates multi-  
462 ancestry GWAS-based weights, translates risk into actionable categories,  
463 communicates effectively, considers patient perspectives, and accommodates evolving  
464 science is essential for the equitable and pragmatic translation of PRS into clinical care.  
465 By addressing the barriers and implementing potential solutions at each stage, we can  
466 leverage PRS to improve preventive healthcare and significantly reduce the burden of  
467 lung cancer.



## 468 **Acknowledgements**

469 We would like to thank Reeya Joseph for her editorial support with the introduction,  
470 Peter Kraft for his advice on our manuscript, and Scott Vrieze for his assistance with  
471 summary statistics for difficulty quitting smoking. We would also like to thank and  
472 acknowledge the participants enrolled in the UK Biobank (obtained under UK Biobank  
473 resource application 52008) and GISC trial for contributing vital data to this work.

474  
475 This research was supported by NIH Training Grant T32GM135117 and NSF Graduate  
476 Research Fellowship DGE-2140743 (T.C.), R35-3CA197449, R01-HL163560, U01-  
477 HG009088, and U01-HG012064 (X.L.), NIH Intramural Research Program (H.Z.), NIH  
478 5T32-HL007776-25, R01-DA056050, R01-CA268030, P30-CA091842-19S5, P30-  
479 CA091842-16S2 and P50-CA244431 (L.C.) and U19-CA203654.

480  
481 **Author Contributions**  
482 T.C., H.Z., and L.C. conceived the project, T.C., G.P., and L.F. carried out all data  
483 analyses under the supervision of H.Z. and L.C. G.S. and D.J. assisted with obtaining  
484 and processing GWAS summary statistics for difficulty quitting smoking. T.C., G.P., H.Z.,  
485 and L.C. drafted the manuscript. All co-authors reviewed and approved the final version  
486 of the manuscript.

487  
488 **Conflicts of Interest**  
489 Laura J. Bierut is listed as an inventor on Issued U.S. Patent 8,080,371, “Markers for  
490 Addiction” covering the use of certain SNPs in determining the diagnosis, prognosis,  
491 and treatment of addiction. Michael J. Bray is an employee at ThinkGenetic, Inc. Where  
492 authors are identified as personnel of the International Agency for Research on  
493 Cancer/World Health Organization, the authors alone are responsible for the views  
494 expressed in this article and they do not necessarily represent the decisions, policy, or  
495 views of the International Agency for Research on Cancer/World Health Organization.  
496 All other authors have no conflict of interests to report.

497  
498 **Data and Code Availability**  
499 R code and plink commands, as well as accompanying data, used for analysis are  
500 provided in a walkthrough available on GitHub at <https://github.com/chen-tony/GREAT>.

501  
502 Genotype data from the 1000 Genomes Project (Phase 3) were acquired via the plink  
503 website <https://www.cog-genomics.org/plink/2.0/resources>. Population information were  
504 obtained from public resources:  
505 <ftp://ftp.1000genomes.ebi.ac.uk/vol1/ftp/release/20130502/> and  
506 [https://ftp.1000genomes.ebi.ac.uk/vol1/ftp/data\\_collections/1000G\\_2504\\_high\\_coverage/1000G\\_698\\_related\\_high\\_coverage.sequence.index](https://ftp.1000genomes.ebi.ac.uk/vol1/ftp/data_collections/1000G_2504_high_coverage/1000G_698_related_high_coverage.sequence.index).

508 **Figures**

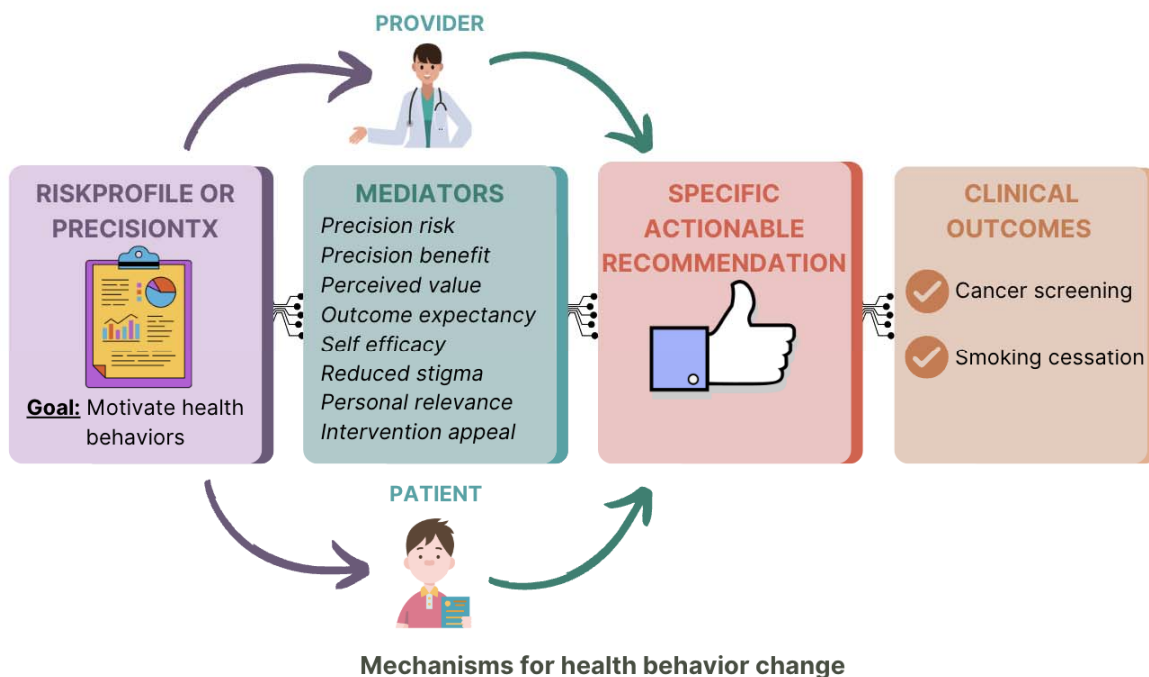

509  
510 **Figure 1. Care Paradigm: Genomic Informed Care for Motivating High Risk**  
511 **Individuals Eligible for Evidence-based Prevention (**GREAT**).** The GREAT  
512 framework is a primary care paradigm that integrates genetic and clinical risk in  
513 precision health. Individuals and their providers in two upcoming trials (PRECISE and  
514 MOTIVATE) are enrolled and provided with multilevel interventions (e.g. RiskProfile and  
515 PrecisionTx) to promote clinical outcomes of lung cancer screening, tobacco treatment,  
516 and successful smoking cessation in primary care settings. Mechanisms of health  
517 behavior changes (e.g., perceived benefit, self-efficacy, and outcome expectancy) will  
518 be evaluated. During the specific actionable recommendations phase, personalized  
519 shared decision-making will be facilitated by multilevel actions between patients and  
520 clinicians for better clinical outcomes.

521  
522

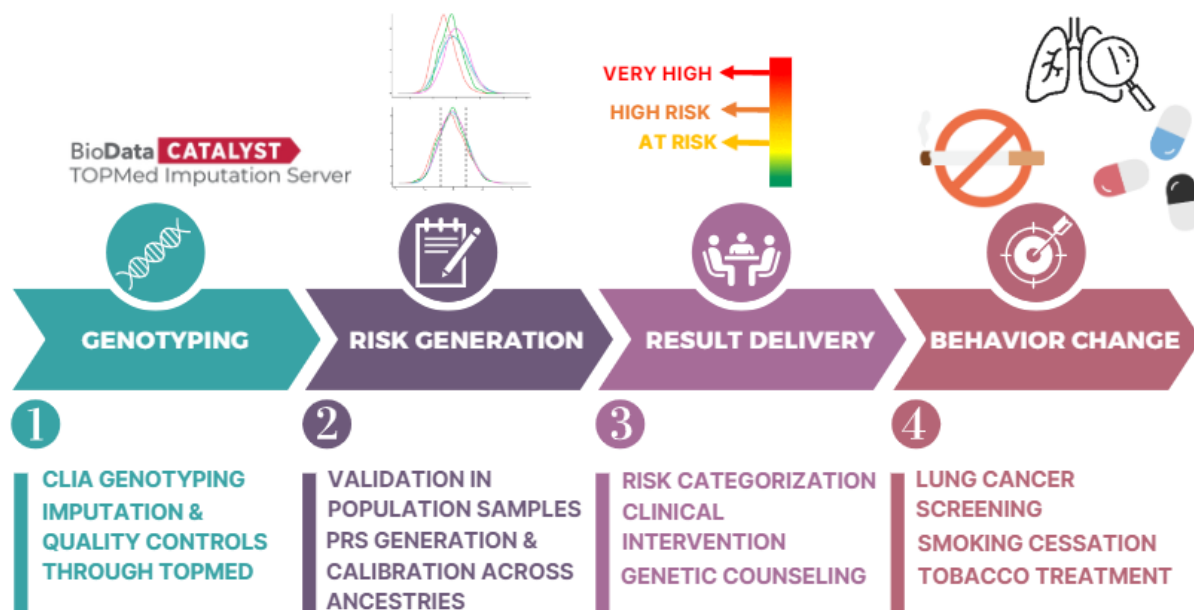

523  
524 **Figure 2 Roadmap for translating genetic data to a genetic risk profile as a**  
525 **multilevel intervention in primary care.** In step 1, enrolled participants' genetic data  
526 are analyzed by 23andMe's Clinical Laboratory Improvement Amendments (CLIA)  
527 certified genotyping process. Imputation and quality controls are conducted through the  
528 Trans-Omics for Precision Medicine (TOPMed) server to ensure the integrity and  
529 reliability of the genetic data, as well as to impute the GWAS variants. Step 2 involves  
530 identifying available GWAS variants and weights to create the raw Polygenic Risk  
531 Scores (PRS). The PRS is adjusted for genetic ancestry using reference data such as  
532 the 1000 Genomes Project Phase 3 and applied to validation data such as the UK  
533 Biobank to establish risk categories and compute ORs. In step 3, these scores are  
534 converted into 3 risk levels based on the established thresholds. In step 4, a report with  
535 precision treatment is created and communicated to both the participant and the  
536 provider to make informed and educated decisions. Behavioral interventionists  
537 (research staff who are trained, certified, and supervised by a team of genetic counselor,  
538 psychologist, and psychiatrist) offer personalized guidance on behavior change,  
539 leveraging the updated genetic insights. The outcome aims to increase lung cancer  
540 screening orders, improve participant adherence, promote smoking cessation, and  
541 highlight the benefits of tobacco treatment.

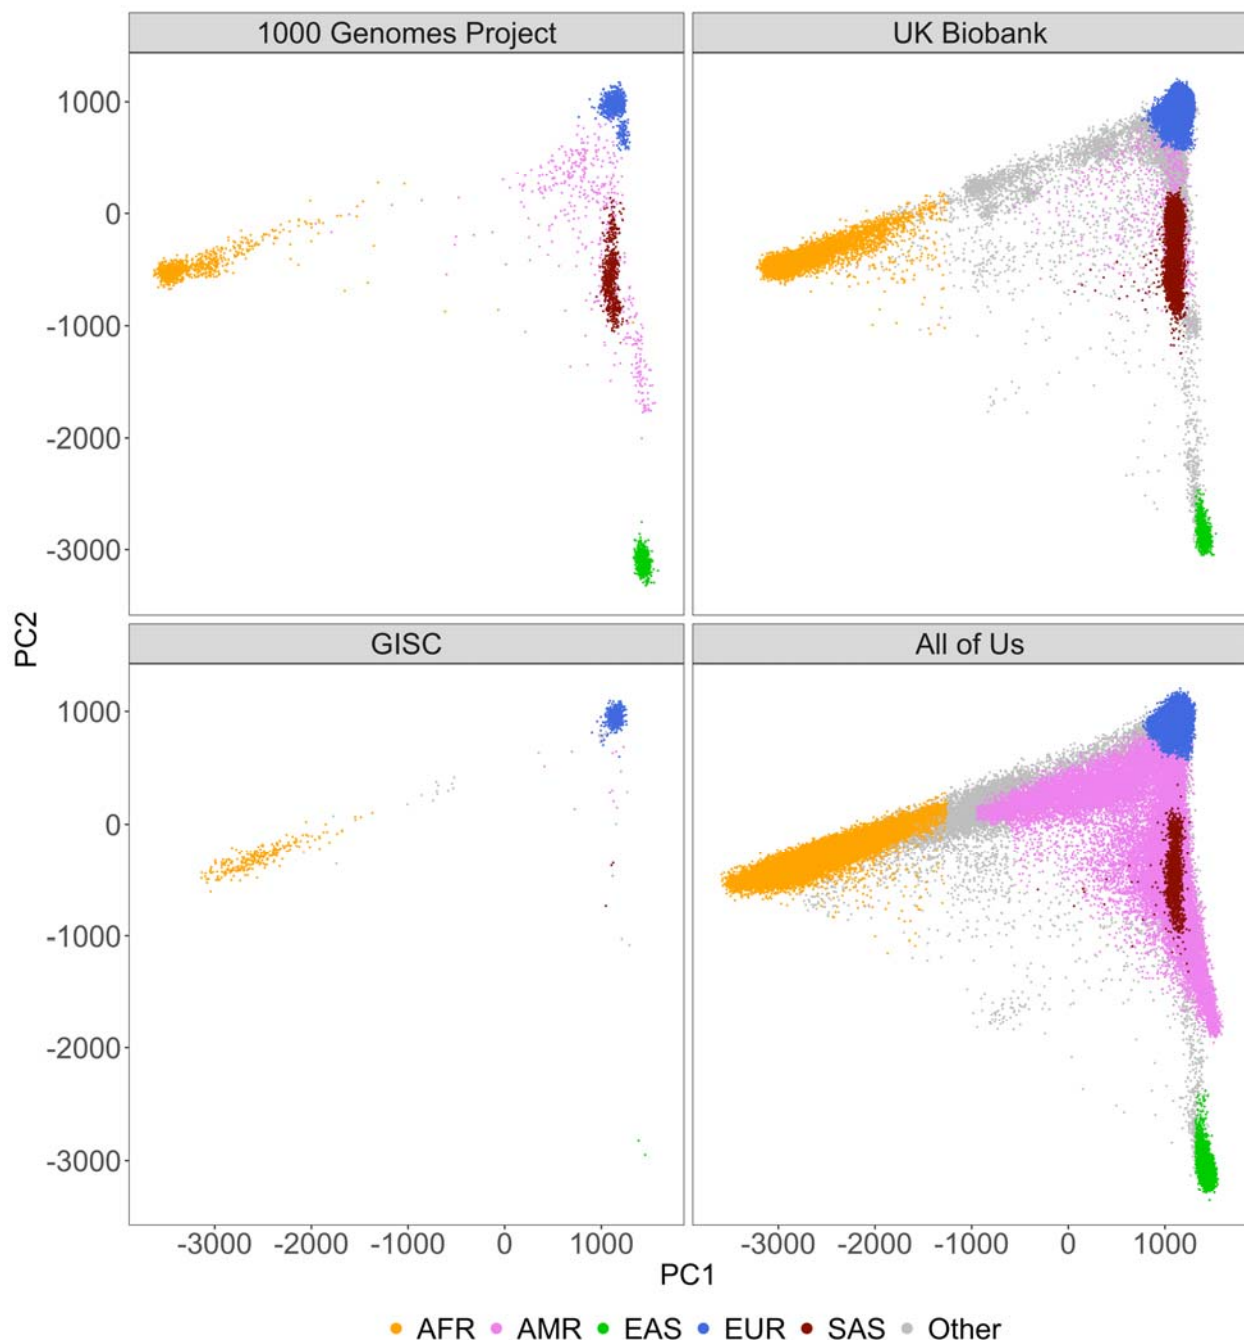

542  
543 **Figure 3. Cross-dataset distribution of genetic ancestry via PCA Projections in**  
544 **1000G, GISC, UKBB, and AoU.** This figure illustrates the utility of principal components  
545 analysis (PCA) loadings obtained from the 1000 Genomes Project Phase 3 (1000G) in  
546 discriminating ancestries within external datasets, the Genetically Informed Smoking  
547 Cessation (GISC) trial. PCA was initially conducted on the globally diverse genotype  
548 data of 1000G. The resultant PCA-space was then used to project genotype data from  
549 GISC, UKBB, and AoU. The scatter plot displays the first and second PCs for each

550 individual in these datasets, with points distinctly marked by genetically-inferred  
551 ancestry.

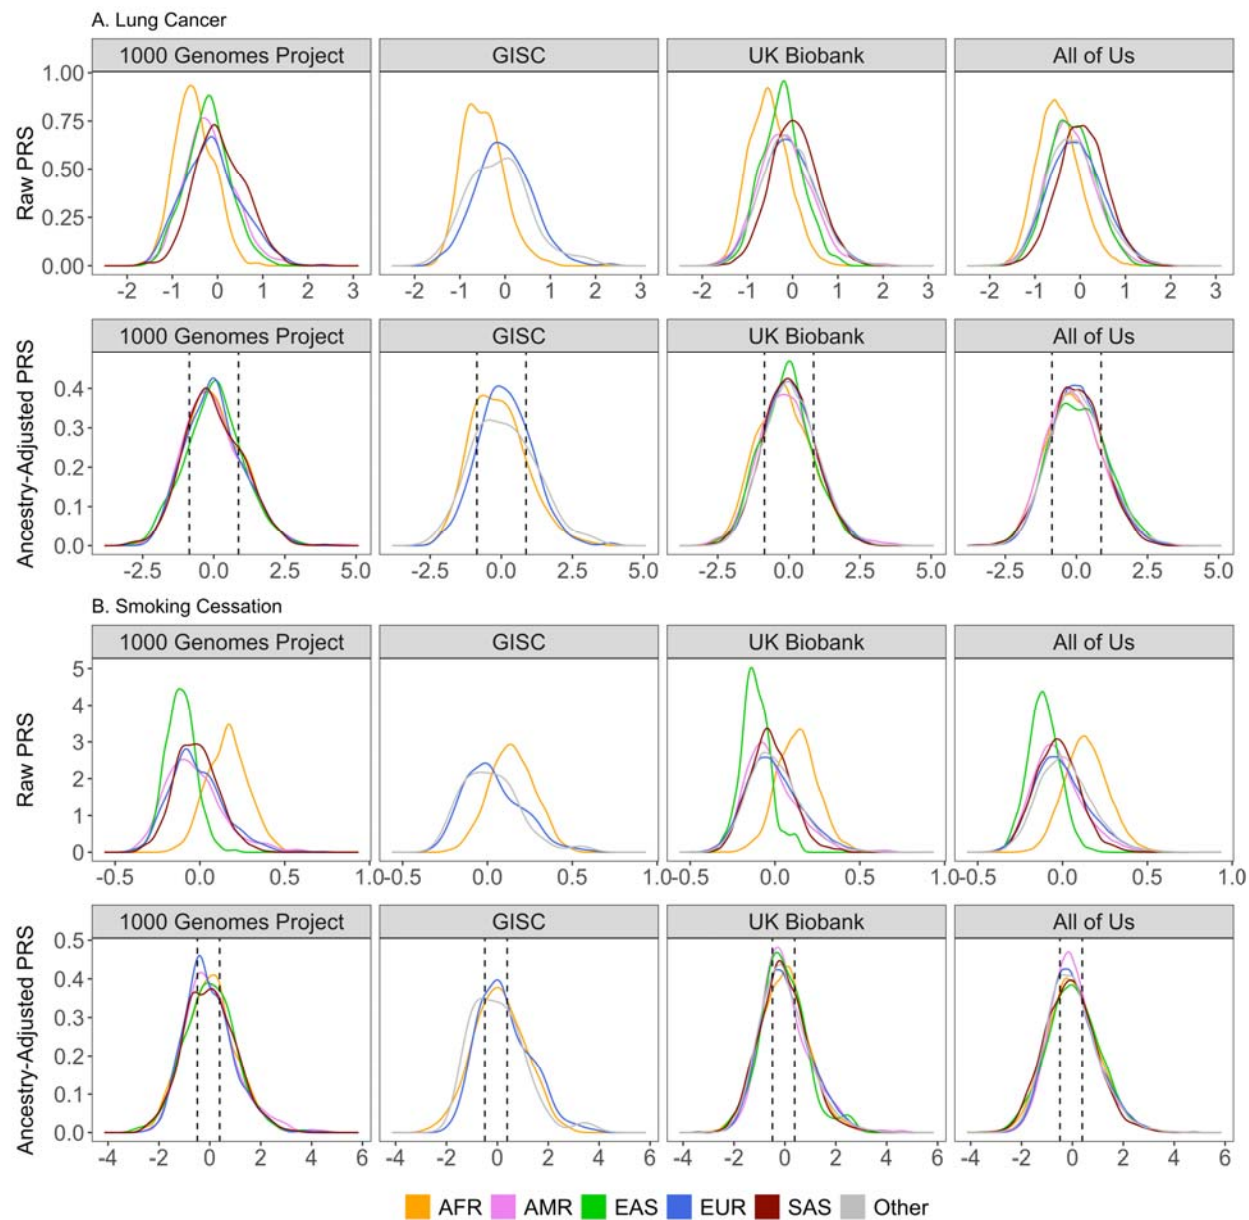

552  
 553 **Figure 4 Ancestry adjustment of PRS for lung cancer and quit difficulty PRS**  
 554 **across ancestral populations.** We showcase the adjustment process for polygenic  
 555 risk scores (PRS) for lung cancer (Panel A) and difficulty quitting smoking (Panel B)  
 556 within the 1000 Genomes Project (1000G), GISC Trial, UK Biobank, and All of Us  
 557 datasets. It displays both raw and ancestry-adjusted PRS, with data points color-coded  
 558 according to genetically-inferred ancestries. EAS, AMR, and SAS ancestries were  
 559 removed for GISC due to their small sample sizes. Ancestry adjustment effectively  
 560 centers the PRS for different ancestries, mitigating the risk of incorrect stratification due  
 561 to ancestry-related biases. Dotted vertical lines correspond to the 20<sup>th</sup> and 80<sup>th</sup>  
 562 percentiles for lung cancer PRS distribution and 33<sup>rd</sup> and 67<sup>th</sup> percentiles for difficulty  
 563 quitting smoking PRS among all 3,202 samples in the 1000 Genomes Project.

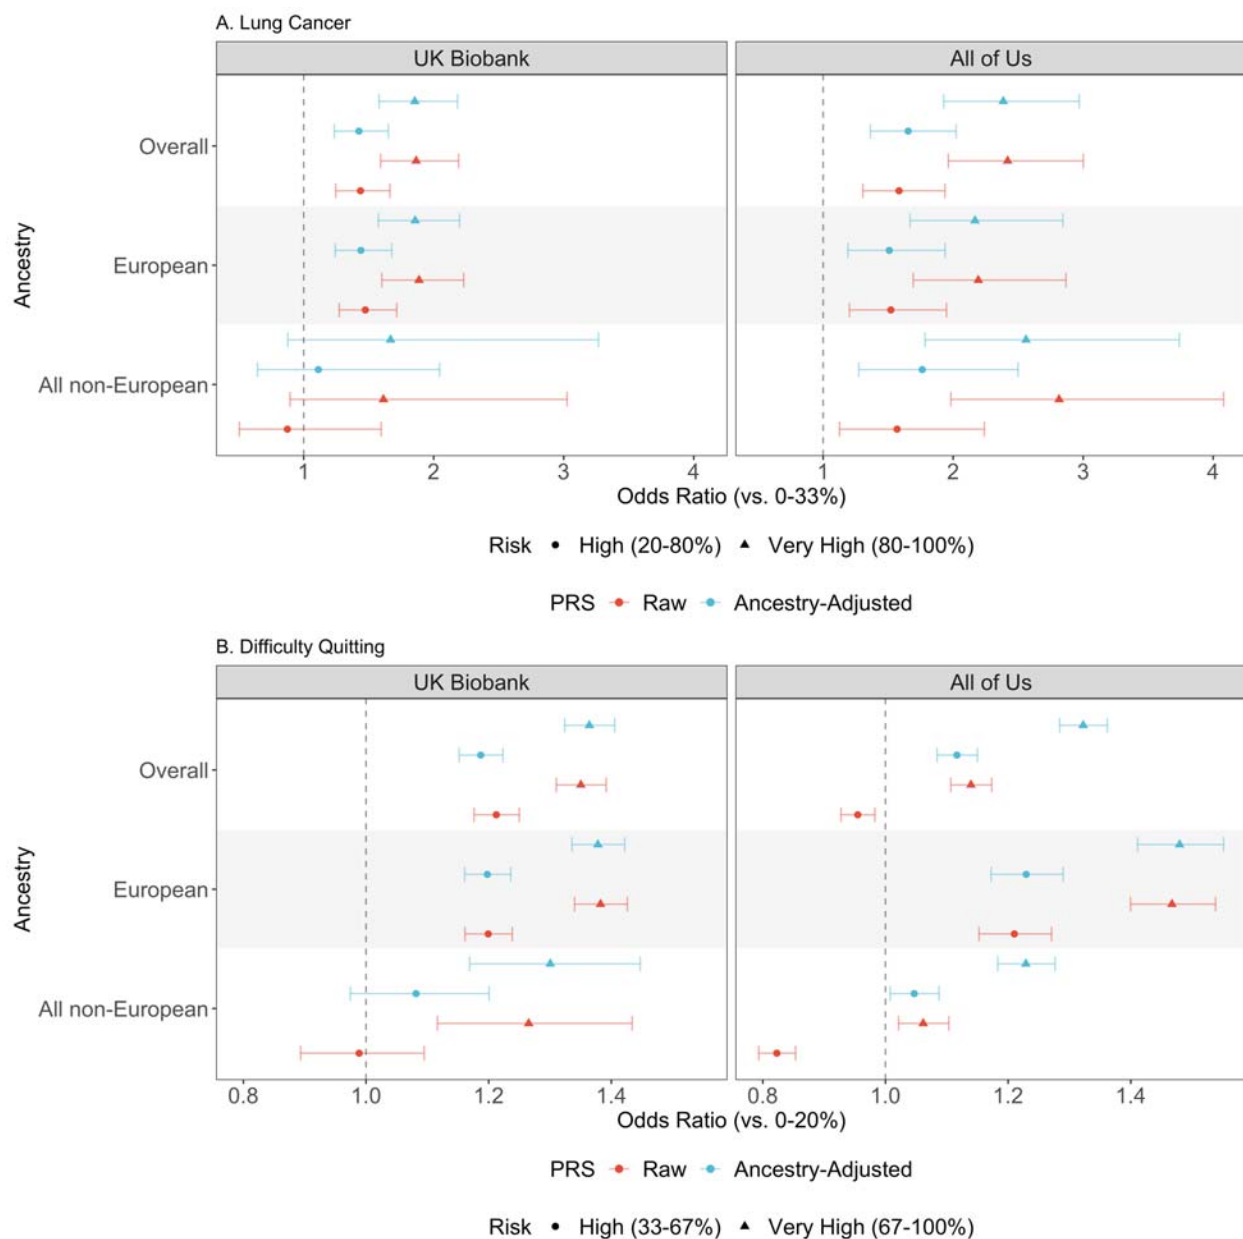

564

565

566 **Figure 5. Risk stratification for lung cancer and difficulty quitting smoking using**  
 567 **raw and ancestry-adjusted PRS.** This figure illustrates the odds ratios (ORs) with  
 568 associated 95% confidence intervals of PRSs for lung cancer (A) and difficulty quitting  
 569 smoking (B) among UK Biobank (N=340,154 for lung cancer and N=152,406 for  
 570 smoking), and All of Us (N=210,826 for lung cancer and N=152,916 for smoking)  
 571 participants. We compare risk stratification using a raw PRS with ancestry-matched  
 572 percentiles, and our ancestry-adjusted PRS with the same percentiles for all individuals.

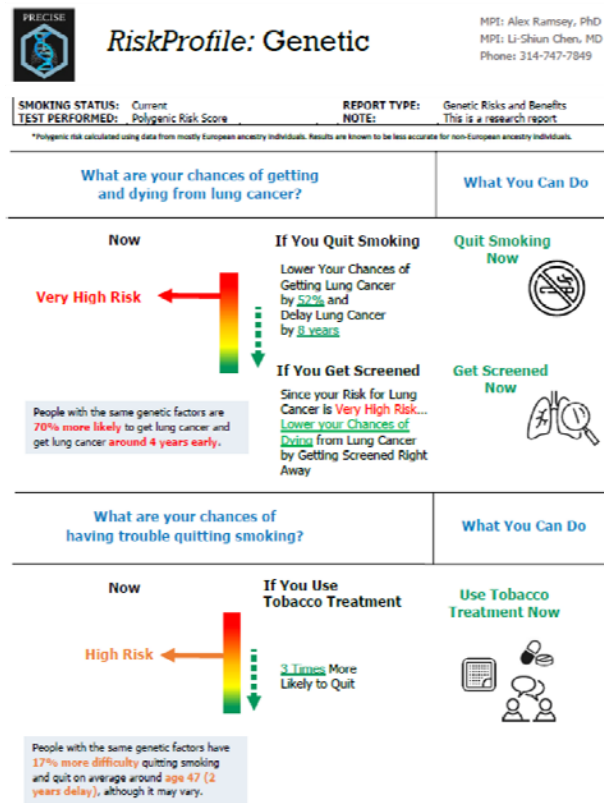

573  
574 **Figure 6. Example 1 clinical report: RiskProfile.** We present example 1 for  
575 genomically-informed interventions using the GREAT framework. RiskProfile is  
576 designed to motivate lung cancer screening and tobacco treatment among screening-  
577 eligible patients. This intervention utilizes ancestry-adjusted PRS to stratify patients into  
578 “at risk” (yellow), “high risk” (orange), and “very high risk” (red) genetic risk categories.  
579 RiskProfile focuses on prevention and expands beyond personalized risk to also provide  
580 personalized benefit of cancer screening and use a multilevel intervention design  
581 directed to both physicians and patients in clinical settings. In an ongoing NCI-funded  
582 trial (NCT05627674), the effect of RiskProfile on clinician ordering and patient completion of  
583 lung cancer screening will be evaluated.



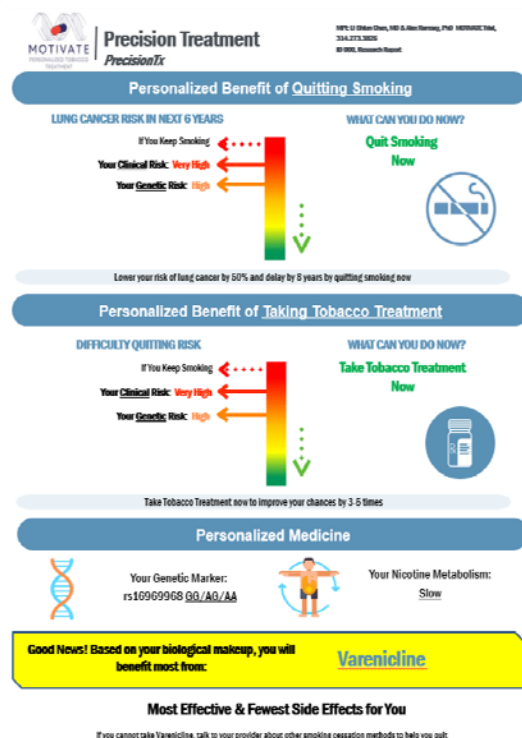

584  
585 **Figure 7. Example 2 clinical report: PrecisionTx.** We present example 2 for  
586 genomically-informed interventions using the GREAT framework. PrecisionTx is  
587 designed to motivate tobacco treatment among patients who smoke. This intervention  
588 utilizes ancestry-adjusted PRS to stratify patients into “at risk” (yellow), “high risk”  
589 (orange), and “very high risk” (red) genetic risk categories. PrecisionTx focuses on  
590 treatment and expands beyond personalized risk to also provide personalized benefit of  
591 tobacco treatment, and use a multilevel intervention design directed to both physicians  
592 and patients in clinical settings. In an ongoing NIDA-funded trial (NCT05846841), the  
593 effect of PrecisionTx on clinician ordering, patient adherence, and smoking abstinence  
594 will be evaluated.

595 **Tables**

|                                     | <b>GenoVA</b>                                                    | <b>eMERGE</b>                                                  | <b>Wisdom</b>                                              | <b>PRECISE / MOTIVATE</b>                                                  |
|-------------------------------------|------------------------------------------------------------------|----------------------------------------------------------------|------------------------------------------------------------|----------------------------------------------------------------------------|
| <b>Goal</b>                         | Motivate early diagnosis                                         | Increasing clinical actions to mitigate risk of future disease | Personalized screening frequency                           | Motivate lung cancer screening (LCS) / tobacco treatment                   |
| <b>Targets</b>                      |                                                                  |                                                                |                                                            |                                                                            |
| <b>Target population</b>            | All general Veterans' Affairs PCP* and patients                  | Patients in the large healthcare system                        | All women can sign up online                               | <b>High risk</b> PC patients (LCS eligible / smokers) and their PCPs       |
| <b>Condition(s)**</b>               | BrCa, PrCa, CRCa, Afib, CAD, T2D                                 | BrCa, PrCa, CRCa, Afib, CAD, T1D, T2D, BMI, Asthma, CKD, HCL   | BrCA                                                       | <b>LC, smoking cessation</b>                                               |
| <b>Target outcome</b>               | New diagnoses                                                    | Change screening practice or lifestyle                         | Screening compliance and cancer detection                  | <b>LCS, tobacco tx, and smoking cessation</b>                              |
| <b>Polygenic Risk Scores</b>        |                                                                  |                                                                |                                                            |                                                                            |
| <b>Genotyping</b>                   | Study team                                                       |                                                                | Color genomics                                             | 23andMe                                                                    |
| <b>Imputation</b>                   | 1000 Genomes                                                     | All of Us                                                      |                                                            | TOPMed                                                                     |
| <b>Create PRS</b>                   | Top or many variants<br>European weights<br>Ancestry calibration | Terra cloud platform<br>Ancestry calibration                   | Color genomics                                             | Top independent variants<br>Multi-ancestry weights<br>Ancestry calibration |
| <b>Risk Stratification</b>          | 2 levels (OR of 2)                                               | OR of 5-10                                                     |                                                            | 3 levels (top 20%, middle, bottom 20%) or tertiles                         |
| <b>Intervention Design</b>          |                                                                  |                                                                |                                                            |                                                                            |
| <b>Risk representation</b>          | Only genetic<br>Format of relative risk                          | Combined clinical + genetic<br>Format of absolute risk         | Combined clinical + genetic<br>Format of absolute risk     | Separate genetic + clinical<br>Format of relative risk                     |
| <b>Messaging</b>                    | Average vs. elevated risk                                        | Average vs. elevated risk                                      | No discussion of risk<br>Only recommend screening schedule | At risk, at high risk, or at very high risk                                |
| <b>Behavior mechanisms targeted</b> |                                                                  |                                                                |                                                            | <b>Perceived risk/benefit, Self efficacy, Personal relevance</b>           |

596  
597 \* PCP=primary care provider

598 \*\* BrCa=breast cancer, PrCa=prostate cancer, CRCa=colorectal cancer, Afib=atrial  
599 fibrillation, CAD=coronary artery/heart disease, T2D=type 2 diabetes, T1D=type 1  
600 diabetes, BMI=body mass index/obesity, CKD=chronic kidney disease,  
601 HCL=hypercholesterolemia, lung cancer=lung cancer  
602

603 **Table 1. Research on PRS use in clinical trials.** We compare the PRECISE and  
604 MOTIVATE trials, part of our GREAT framework, with existing PRS-informed trials:  
605 GenoVA, eMERGE, and WISDOM. Bolded text in the PRECISE / MOTIVATE column  
606 highlight the points where our trials differ from the current trials. Namely, the PRECISE  
607 and MOTIVATE trials investigate lung cancer and smoking and will focus on high risk  
608 patients who are smokers or eligible for lung cancer screening. We also look at lung  
609 cancer screening, tobacco treatment, and smoking cessation as unique target outcomes.  
610 Finally, in addition to genetic and clinical risk messaging, the two trials have a unique  
611 emphasis on behavior mechanisms around lung cancer and smoking.  
612

## 613 References

- 614 1. Kocarnik, J. M. *et al.* Cancer Incidence, Mortality, Years of Life Lost, Years Lived With  
615 Disability, and Disability-Adjusted Life Years for 29 Cancer Groups From 2010 to 2019.  
616 *JAMA Oncol* **8**, 420 (2022).
- 617 2. Torkamani, A., Wineinger, N. E. & Topol, E. J. The personal and clinical utility of polygenic  
618 risk scores. *Nature Reviews Genetics* vol. 19 581–590 Preprint at  
619 <https://doi.org/10.1038/s41576-018-0018-x> (2018).
- 620 3. Lewis, C. M. & Vassos, E. Polygenic risk scores: From research tools to clinical instruments.  
621 *Genome Medicine* vol. 12 Preprint at <https://doi.org/10.1186/s13073-020-00742-5>  
622 (2020).
- 623 4. Adeyemo, A. *et al.* Responsible use of polygenic risk scores in the clinic: potential benefits,  
624 risks and gaps. *Nature Medicine* vol. 27 1876–1884 Preprint at  
625 <https://doi.org/10.1038/s41591-021-01549-6> (2021).
- 626 5. Vilhjálmsson, B. J. *et al.* Modeling Linkage Disequilibrium Increases Accuracy of Polygenic  
627 Risk Scores. *Am J Hum Genet* **97**, 576–592 (2015).
- 628 6. Wray, N. R., Goddard, M. E. & Visscher, P. M. Prediction of individual genetic risk to  
629 disease from genome-wide association studies. *Genome Res* **17**, 1520–1528 (2007).
- 630 7. Zhang, H. *et al.* A new method for multiancestry polygenic prediction improves  
631 performance across diverse populations. *Nat Genet* (2023) doi:10.1038/s41588-023-  
632 01501-z.
- 633 8. Ruan, Y. *et al.* Improving polygenic prediction in ancestrally diverse populations. *Nat*  
634 *Genet* **54**, 573–580 (2022).
- 635 9. Chen, T., Zhang, H., Mazumder, R. & Lin, X. Ensembled best subset selection using  
636 summary statistics for polygenic risk prediction. *bioRxiv* (2023)  
637 doi:10.1101/2023.09.25.559307.
- 638 10. Martin, A. R. *et al.* Clinical use of current polygenic risk scores may exacerbate health  
639 disparities. *Nat Genet* **51**, 584–591 (2019).
- 640 11. Linder, J. E. *et al.* Returning integrated genomic risk and clinical recommendations: The  
641 eMERGE study. *Genetics in Medicine* **25**, 100006 (2023).
- 642 12. Hao, L. *et al.* Development of a clinical polygenic risk score assay and reporting workflow.  
643 *Nat Med* **28**, 1006–1013 (2022).
- 644 13. Shieh, Y. *et al.* Breast Cancer Screening in the Precision Medicine Era: Risk-Based  
645 Screening in a Population-Based Trial. *J Natl Cancer Inst* **109**, djw290 (2017).
- 646 14. Zhang, P. *et al.* Association of smoking and polygenic risk with the incidence of lung  
647 cancer: a prospective cohort study. *Br J Cancer* **126**, 1637–1646 (2022).
- 648 15. Kanwal, M., Ding, X.-J. & Cao, Y. Familial risk for lung cancer. *Oncol Lett* **13**, 535–542  
649 (2017).
- 650 16. Hung, R. J. *et al.* Assessing Lung Cancer Absolute Risk Trajectory Based on a Polygenic Risk  
651 Model. *Cancer Res* **81**, 1607–1615 (2021).
- 652 17. Michie, S. Making psychological theory useful for implementing evidence based practice:  
653 a consensus approach. *Qual Saf Health Care* **14**, 26–33 (2005).
- 654 18. Cane, J., O'Connor, D. & Michie, S. Validation of the theoretical domains framework for  
655 use in behaviour change and implementation research. *Implementation Science* **7**, 37  
656 (2012).

- 657 19. Atkins, L. *et al.* A guide to using the Theoretical Domains Framework of behaviour change  
658 to investigate implementation problems. *Implementation Science* **12**, 77 (2017).
- 659 20. Ge, T. *et al.* Development and validation of a trans-ancestry polygenic risk score for type 2  
660 diabetes in diverse populations. *Genome Med* **14**, 70 (2022).
- 661 21. Chen, L. *et al.* Genetic Variant in *CHRNA5* and Response to Varenicline and Combination  
662 Nicotine Replacement in a Randomized Placebo-Controlled Trial. *Clin Pharmacol Ther* **108**,  
663 1315–1325 (2020).
- 664 22. Sudlow, C. *et al.* UK Biobank: An Open Access Resource for Identifying the Causes of a  
665 Wide Range of Complex Diseases of Middle and Old Age. *PLoS Med* **12**, e1001779 (2015).
- 666 23. Bick, A. G. *et al.* Genomic data in the All of Us Research Program. *Nature* (2024)  
667 doi:10.1038/s41586-023-06957-x.
- 668 24. Auton, A. *et al.* A global reference for human genetic variation. *Nature* **526**, 68–74 (2015).
- 669 25. Byrská-Bishop, M. *et al.* High-coverage whole-genome sequencing of the expanded 1000  
670 Genomes Project cohort including 602 trios. *Cell* **185**, 3426–3440.e19 (2022).
- 671 26. Chang, C. C. *et al.* Second-generation PLINK: rising to the challenge of larger and richer  
672 datasets. *Gigascience* **4**, 7 (2015).
- 673 27. Chen, S. *et al.* A genome-wide mutational constraint map quantified from variation in  
674 76,156 human genomes. *bioRxiv* 2022.03.20.485034 (2022)  
675 doi:10.1101/2022.03.20.485034.
- 676 28. Byun, J. *et al.* Cross-ancestry genome-wide meta-analysis of 61,047 cases and 947,237  
677 controls identifies new susceptibility loci contributing to lung cancer. *Nat Genet* **54**,  
678 1167–1177 (2022).
- 679 29. Saunders, G. R. B. *et al.* Genetic diversity fuels gene discovery for tobacco and alcohol use.  
680 *Nature* **612**, 720–724 (2022).
- 681 30. Martin, A. R. *et al.* Human Demographic History Impacts Genetic Risk Prediction across  
682 Diverse Populations. *The American Journal of Human Genetics* **100**, 635–649 (2017).
- 683 31. Manrai, A. K. *et al.* Genetic Misdiagnoses and the Potential for Health Disparities. *New*  
684 *England Journal of Medicine* **375**, 655–665 (2016).
- 685 32. Ochoa, A. genio: Genetics Input/Output Functions. Preprint at [https://CRAN.R-](https://CRAN.R-project.org/package=genio)  
686 [project.org/package=genio](https://CRAN.R-project.org/package=genio) (2023).
- 687 33. Lewis, A. C. F. *et al.* Getting genetic ancestry right for science and society. *Science* (1979)  
688 **376**, 250–252 (2022).
- 689 34. Kachuri, L. *et al.* Principles and methods for transferring polygenic risk scores across  
690 global populations. *Nat Rev Genet* (2023) doi:10.1038/s41576-023-00637-2.
- 691 35. US Preventive Services Task Force. Lung Cancer: Screening.  
692 [https://www.uspreventiveservicestaskforce.org/uspstf/recommendation/lung-cancer-](https://www.uspreventiveservicestaskforce.org/uspstf/recommendation/lung-cancer-screening)  
693 [screening](https://www.uspreventiveservicestaskforce.org/uspstf/recommendation/lung-cancer-screening) (2021).
- 694 36. Agency for Healthcare Research and Quality. Clinical Guidelines and Recommendations.  
695 <https://www.ahrq.gov/prevention/guidelines/index.html> (2021).
- 696 37. Tobacco Use and Dependence Guideline Panel. *US Department of Health and Human*  
697 *Services. (2008). Tobacco Use and Dependence Guideline Panel. Treating Tobacco Use and*  
698 *Dependence: 2008 Update.* (US Department of Health and Human Services, Rockville, MD,  
699 2008).
- 700 38. Krist, A. H. *et al.* Screening for Lung Cancer. *JAMA* **325**, 962 (2021).

- 701 39. Ayatollahi, H., Hosseini, S. F. & Hemmat, M. Integrating Genetic Data into Electronic  
702 Health Records: Medical Geneticists' Perspectives. *Healthc Inform Res* **25**, 289 (2019).
- 703 40. Bourdon, J. L. *et al.* In-vivo design feedback and perceived utility of a genetically-informed  
704 smoking risk tool among current smokers in the community. *BMC Med Genomics* **14**, 139  
705 (2021).
- 706 41. Ramsey, A. T. *et al.* Participatory Design of a Personalized Genetic Risk Tool to Promote  
707 Behavioral Health. *Cancer Prevention Research* **13**, 583–592 (2020).
- 708 42. Ramsey, A. T. *et al.* Proof of Concept of a Personalized Genetic Risk Tool to Promote  
709 Smoking Cessation: High Acceptability and Reduced Cigarette Smoking. *Cancer Prevention*  
710 *Research* **14**, 253–262 (2021).
- 711 43. Ramsey, A. T. *et al.* Toward the implementation of genomic applications for smoking  
712 cessation and smoking-related diseases. *Transl Behav Med* **8**, 7–17 (2018).
- 713 44. Chen, L.-S., Baker, T. B., Ramsey, A., Amos, C. I. & Bierut, L. J. Genomic medicine to reduce  
714 tobacco and related disorders: Translation to precision prevention and treatment.  
715 *Addiction Neuroscience* **7**, 100083 (2023).
- 716 45. Chiu, A. *et al.* Most Current Smokers Desire Genetic Susceptibility Testing and Genetically-  
717 Efficacious Medication. *Journal of Neuroimmune Pharmacology* **13**, 430–437 (2018).
- 718 46. Quaife, S. L., Janes, S. M. & Brain, K. E. The person behind the nodule: a narrative review  
719 of the psychological impact of lung cancer screening. *Transl Lung Cancer Res* **10**, 2427–  
720 2440 (2021).
- 721 47. Quaife, S. L. *et al.* Psychological Targets for Lung Cancer Screening Uptake: A Prospective  
722 Longitudinal Cohort Study. *Journal of Thoracic Oncology* **16**, 2016–2028 (2021).
- 723 48. Quaife, S. L., Marlow, L. A. V., McEwen, A., Janes, S. M. & Wardle, J. Attitudes towards  
724 lung cancer screening in socioeconomically deprived and heavy smoking communities:  
725 informing screening communication. *Health Expectations* **20**, 563–573 (2017).
- 726 49. Quaife, S. L., McEwen, A., Janes, S. M. & Wardle, J. Smoking is associated with pessimistic  
727 and avoidant beliefs about cancer: results from the International Cancer Benchmarking  
728 Partnership. *Br J Cancer* **112**, 1799–1804 (2015).
- 729 50. Peterson, R. E. *et al.* Genome-wide Association Studies in Ancestrally Diverse Populations:  
730 Opportunities, Methods, Pitfalls, and Recommendations. *Cell* **179**, 589–603 (2019).
- 731 51. Popejoy, A. B. & Fullerton, S. M. Genomics is failing on diversity. *Nature* **538**, 161–164  
732 (2016).
- 733 52. Need, A. C. & Goldstein, D. B. Next generation disparities in human genomics: concerns  
734 and remedies. *Trends in Genetics* **25**, 489–494 (2009).
- 735 53. Fitipaldi, H. & Franks, P. W. Ethnic, gender and other sociodemographic biases in genome-  
736 wide association studies for the most burdensome non-communicable diseases: 2005–  
737 2022. *Hum Mol Genet* **32**, 520–532 (2023).
- 738 54. Jin, J. *et al.* MUSSEL: Enhanced Bayesian polygenic risk prediction leveraging information  
739 across multiple ancestry groups. *Cell Genomics* **4**, 100539 (2024).
- 740 55. Zhang, J. *et al.* An ensemble penalized regression method for multi-ancestry polygenic  
741 risk prediction. *Nat Commun* **15**, 3238 (2024).
- 742 56. Hou, K. *et al.* Admix-kit: an integrated toolkit and pipeline for genetic analyses of admixed  
743 populations. *Bioinformatics* **40**, (2024).

- 744 57. Bray, M. *et al.* The Promise of Polygenic Risk Prediction in Smoking Cessation: Evidence  
745 From Two Treatment Trials. *Nicotine & Tobacco Research* **24**, 1573–1580 (2022).
- 746 58. Ramsey, A. T. *et al.* Designing for Accelerated Translation (DART) of emerging innovations  
747 in health. *J Clin Transl Sci* **3**, 53–58 (2019).
- 748 59. Proctor, E. *et al.* FAST: A Framework to Assess Speed of Translation of Health Innovations  
749 to Practice and Policy. *Global Implementation Research and Applications* **2**, 107–119  
750 (2022).
- 751 60. Scoville, E. A. *et al.* Precision nicotine metabolism-informed care for smoking cessation in  
752 Crohn’s disease: A pilot study. *PLoS One* **15**, e0230656 (2020).
- 753 61. Chen, L.-S. *et al.* Low-Burden Strategies to Promote Smoking Cessation Treatment Among  
754 Patients With Serious Mental Illness. *Psychiatric Services* **69**, 849–851 (2018).
- 755 62. Ramsey, A. T. *et al.* Care-paradigm shift promoting smoking cessation treatment among  
756 cancer center patients via a low-burden strategy, Electronic Health Record-Enabled  
757 Evidence-Based Smoking Cessation Treatment. *Transl Behav Med* (2019)  
758 doi:10.1093/tbm/ibz107.
- 759 63. Kaphingst, K. A. *et al.* Comparing models of delivery for cancer genetics services among  
760 patients receiving primary care who meet criteria for genetic evaluation in two  
761 healthcare systems: BRIDGE randomized controlled trial. *BMC Health Serv Res* **21**, 542  
762 (2021).
- 763
- 764
